# Supplementary material
Source: publisher figshare collection journal article supplement (https://sage.figshare.com/ndownloader/files/23017682)
Supplement: Supplementary file 1 [file 23017682]

**ONLINE SUPPLEMENT Table***School Nursing Task Ratings-Comprehensive Listing*

| Task Statement                                                      | Mean Importance <sup>a</sup> | Median Frequency <sub>b</sub> |
|---------------------------------------------------------------------|------------------------------|-------------------------------|
| <u>Assessment and Diagnosis</u>                                     |                              |                               |
| Analyze student's attendance history                                | 3.09                         | 3.0                           |
| Analyze a peak flow reading                                         | 2.38                         | 1.0                           |
| Assess allergy status of student                                    | 3.69                         | 4.0                           |
| Assess student medication history                                   | 3.64                         | 4.0                           |
| Assess mechanism of an injury                                       | 3.65                         | 4.0                           |
| Assess for changes in family structure, circumstances, and dynamics | 3.24                         | 3.0                           |
| Assess cardiovascular status                                        | 3.50                         | 3.0                           |
| Assess hydration status                                             | 3.48                         | 3.0                           |
| Assess respiratory status                                           | 3.72                         | 4.0                           |
| Assess spiritual and cultural needs                                 | 2.76                         | 2.0                           |
| Assess gastrointestinal status                                      | 3.42                         | 3.0                           |
| Assess genitourinary status                                         | 3.15                         | 3.0                           |
| Assess level of pain                                                | 3.64                         | 4.0                           |
| Assess vital signs                                                  | 3.62                         | 4.0                           |
| Assess need for PRN medications                                     | 3.42                         | 3.0                           |
| Assess neurological status                                          | 3.69                         | 3.0                           |
| Assess musculoskeletal status                                       | 3.49                         | 3.0                           |
| Assess range of motion                                              | 3.44                         | 3.0                           |
| Assess skin integrity                                               | 3.39                         | 3.0                           |
| Assess for communicable diseases                                    | 3.60                         | 3.0                           |
| Assess for personal hygiene                                         | 3.03                         | 3.0                           |
| Assess for self-harm                                                | 3.54                         | 2.0                           |
| Assess for signs of depression                                      | 3.52                         | 3.0                           |
| Assess for substance use                                            | 3.29                         | 2.0                           |
| Assess for use of durable medical equipment (DME)                   | 2.87                         | 2.0                           |
| Assess for risk of suicide                                          | 3.65                         | 2.0                           |
| Assess a wound                                                      | 3.64                         | 4.0                           |
| Assess blood glucose                                                | 3.83                         | 4.0                           |
| Assess continuous glucose monitoring (CGM)                          | 3.59                         | 2.0                           |
| Assess ketones                                                      | 3.45                         | 2.0                           |
| Assess growth and development                                       | 2.88                         | 2.0                           |
| Assess for head lice                                                | 2.42                         | 2.0                           |
| Collect health history                                              | 3.55                         | 3.0                           |
| Assess for hunger                                                   | 3.38                         | 3.0                           |
| Assess nutritional status                                           | 3.26                         | 3.0                           |
| Assess sleep patterns                                               | 3.15                         | 2.0                           |

|                                                                       |      |     |
|-----------------------------------------------------------------------|------|-----|
| Determine if student feels safe                                       | 3.48 | 2.0 |
| Assess student has support systems                                    | 3.37 | 3.0 |
| Assess immunization status                                            | 3.66 | 4.0 |
| Explain rights of privacy before collecting data                      | 3.11 | 2.0 |
| Identify nursing diagnoses for care plan                              | 3.05 | 3.0 |
| Interview student regarding chief complaint                           | 3.73 | 4.0 |
| Monitor for medication side effects                                   | 3.46 | 3.0 |
| Observe student in the educational setting                            | 2.67 | 2.0 |
| Observe student for signs and symptoms related to chief complaint     | 3.67 | 4.0 |
| Assess head, ears, eyes, nose, and throat (HEENT)                     | 3.53 | 4.0 |
| Assess for developmental milestones                                   | 2.84 | 2.0 |
| Review student's health record                                        | 3.56 | 4.0 |
| Assess the need for an interpreter                                    | 3.20 | 2.0 |
| Assess for overdose                                                   | 3.39 | 1.0 |
| <u>Practice and Treatments</u>                                        |      |     |
| Document a health history                                             | 3.58 | 4.0 |
| Measure height and weight                                             | 2.80 | 2.0 |
| Monitor student on supplemental oxygen                                | 3.33 | 0.0 |
| Obtain student immunization records and determine compliance          | 3.70 | 4.0 |
| Perform peak flow monitoring                                          | 2.69 | 1.0 |
| Perform pulse oximetry                                                | 3.28 | 3.0 |
| Perform triage                                                        | 3.72 | 4.0 |
| Screen student for early identification of behavioral health problems | 3.09 | 2.0 |
| Screen student for early identification of mental health problems     | 3.23 | 2.0 |
| Screen student for early identification of physical health problems   | 3.43 | 3.0 |
| Screen student for dental problems                                    | 3.14 | 2.0 |
| Screen student's hearing                                              | 3.45 | 3.0 |
| Screen student for spinal irregularities                              | 2.71 | 1.0 |
| Screen student's vision                                               | 3.59 | 4.0 |
| Screen for drug use                                                   | 2.94 | 1.0 |
| Administer fluoride treatments                                        | 1.61 | 0.0 |
| Administer immunizations to staff                                     | 1.82 | 0.0 |
| Administer immunizations to students                                  | 2.23 | 0.0 |
| Administer injections (e.g. insulin, B12)                             | 3.42 | 2.0 |
| Administer medications                                                | 3.81 | 4.0 |
| Administer a nebulizer treatment                                      | 3.64 | 2.0 |
| Administer tube feeding                                               | 3.50 | 1.0 |

|                                                                               |      |     |
|-------------------------------------------------------------------------------|------|-----|
| Administer emergency rescue medication (e.g. glucagon, epinephrine, naloxone) | 3.80 | 1.0 |
| Assist student with carbohydrate/insulin calculation                          | 3.75 | 3.0 |
| Assist student with insulin delivery via pump                                 | 3.71 | 2.0 |
| Assist student with inhaler/spacer                                            | 3.74 | 3.0 |
| Compare calculated medication dosage range with approved F.D.A. guidelines    | 3.32 | 2.0 |
| Call 9-1-1/EMS                                                                | 3.76 | 1.0 |
| Perform urinary catheterization                                               | 3.35 | 0.0 |
| Assist with mobility, transfers, lifting                                      | 3.06 | 1.0 |
| Implement care plans                                                          | 3.57 | 4.0 |
| Conduct home visit                                                            | 2.21 | 0.0 |
| Counsel students regarding behavioral health issues                           | 2.94 | 2.0 |
| Counsel students regarding mental health issues                               | 3.13 | 2.0 |
| Counsel students regarding physical health related issues                     | 3.48 | 3.0 |
| Counsel students during traumatic events                                      | 3.38 | 2.0 |
| Inventory medications upon receipt                                            | 3.81 | 4.0 |
| Document all health office visits                                             | 3.83 | 4.0 |
| Document procedures and student response                                      | 3.80 | 4.0 |
| Manage Do Not Resuscitate (DNR) orders                                        | 3.12 | 0.0 |
| Manage parenteral medications and fluids (e.g. ports and shunts)              | 3.23 | 0.0 |
| Monitor and document ventilator function                                      | 3.24 | 0.0 |
| Obtain health care provider's orders for treatments and procedures            | 3.80 | 4.0 |
| Clarify health care provider's order                                          | 3.81 | 3.0 |
| Perform CPR                                                                   | 3.79 | 0.0 |
| Perform chest percussion                                                      | 3.20 | 0.0 |
| Perform passive and active range of motion                                    | 2.86 | 1.0 |
| Perform suctioning                                                            | 3.33 | 0.0 |
| Protect student privacy                                                       | 3.87 | 4.0 |
| Provide culturally appropriate care                                           | 3.61 | 4.0 |
| Provide developmentally appropriate care                                      | 3.71 | 4.0 |
| Provide first aid                                                             | 3.84 | 4.0 |
| Provide health services in accordance with IEP and 504s                       | 3.80 | 4.0 |
| Provide holistic nursing care                                                 | 3.35 | 3.0 |
| Provide ostomy care                                                           | 3.20 | 0.0 |
| Provide tracheostomy care                                                     | 3.34 | 0.0 |
| Refer families to community resources                                         | 3.63 | 3.0 |
| Refer student with abnormal screening for follow-up                           | 3.75 | 4.0 |
| Refer staff with abnormal screening for follow-up                             | 3.04 | 2.0 |
| Operate an Automatic External Defibrillator (AED)                             | 3.79 | 0.0 |
| Use complementary and alternative therapies                                   | 2.50 | 1.0 |

|                                                                                                                   |      |     |
|-------------------------------------------------------------------------------------------------------------------|------|-----|
| Supervise or oversee management of one-to-one nursing care                                                        | 3.22 | 1.0 |
| <u>Health Education and Promotion</u>                                                                             |      |     |
| Organize or participate in health fairs                                                                           | 2.38 | 1.0 |
| Coordinate or contribute to staff wellness programs                                                               | 2.77 | 2.0 |
| Develop or distribute materials to promote health and wellness                                                    | 3.07 | 3.0 |
| Educate classmates about a student's health disorder (with consent)                                               | 3.17 | 2.0 |
| Provide education on health conditions and treatment                                                              | 3.52 | 3.0 |
| Establish community partnerships                                                                                  | 3.18 | 2.0 |
| Participate in health curriculum development                                                                      | 2.75 | 1.0 |
| Provide and document OSHA regulated training for staff (e.g. bloodborne pathogens, standard precautions)          | 3.21 | 3.0 |
| Create and provide health care information and resources to parents/guardians                                     | 3.38 | 3.0 |
| Provide resources to support classroom teaching on health issues regarding specific health care needs of students | 3.33 | 3.0 |
| Educate and support staff regarding specific health care needs of students                                        | 3.77 | 4.0 |
| Teach and promote infection control practices                                                                     | 3.64 | 3.0 |
| Teach breast/testicular self-exam                                                                                 | 2.21 | 0.0 |
| Teach sex education in the classroom                                                                              | 2.44 | 0.0 |
| Teach growth and development (puberty)                                                                            | 2.78 | 1.0 |
| Teach CPR to staff                                                                                                | 3.06 | 0.0 |
| Teach CPR to students                                                                                             | 2.78 | 0.0 |
| Teach first aid to staff                                                                                          | 3.14 | 2.0 |
| Teach first aid to students                                                                                       | 2.85 | 1.0 |
| Teach health related topics to students (e.g. dental health, hand washing, sleep hygiene)                         | 3.29 | 3.0 |
| Teach health related topics to staff (e.g. dental health, hand washing, sleep hygiene)                            | 2.86 | 2.0 |
| Teach use of Automatic External Defibrillators (AEDs)                                                             | 3.24 | 2.0 |
| Train staff to recognize and respond to life threatening health problems                                          | 3.71 | 3.0 |
| Teach self-care related to chronic condition                                                                      | 3.51 | 3.0 |
| Teach self-care related to acute condition                                                                        | 3.51 | 3.0 |
| <u>Planning</u>                                                                                                   |      |     |
| Refer to appropriate Health Insurance Programs                                                                    | 2.53 | 1.0 |
| Case manage students with chronic conditions                                                                      | 3.40 | 3.0 |
| Collaborate with local providers for emergency service during the school day                                      | 3.05 | 2.0 |
| Collaborate with school food services staff regarding special dietary needs of students                           | 3.47 | 3.0 |
| Communicate with parent/guardian                                                                                  | 3.86 | 4.0 |

|                                                                                           |      |     |
|-------------------------------------------------------------------------------------------|------|-----|
| Contribute to the Section 504 health-related plan                                         | 3.63 | 3.0 |
| Collaborate in Section 504 meetings                                                       | 3.55 | 3.0 |
| Develop health-related goals for an Individualized Education Plan (IEP)                   | 3.43 | 2.0 |
| Participate in Individualized Education Plan (IEP) meetings                               | 3.39 | 2.0 |
| Coordinate awareness programs related to pregnancy prevention                             | 2.68 | 0.0 |
| Coordinate with community resources related to pregnancy and parenting support            | 2.73 | 0.0 |
| Coordinate awareness programs related to relationship violence                            | 2.77 | 0.0 |
| Coordinate care with healthcare provider(s)                                               | 3.50 | 3.0 |
| Collaborate in developing a drug, alcohol, and tobacco awareness program                  | 2.79 | 1.0 |
| Collaborate in developing anti-bullying programs                                          | 2.79 | 1.0 |
| Determine if follow-up care has occurred                                                  | 3.48 | 3.0 |
| Develop an individualized healthcare plan                                                 | 3.66 | 4.0 |
| Develop an emergency care plan                                                            | 3.77 | 4.0 |
| Collaborate in emergency response planning                                                | 3.58 | 3.0 |
| Collaborate in threat assessment planning                                                 | 3.23 | 2.0 |
| Collaborate in planning for gender non-conforming students                                | 2.91 | 1.0 |
| Evaluate and revise the individualized health care plan                                   | 3.60 | 3.0 |
| Document plan of care using standardized language                                         | 3.43 | 3.0 |
| Modify health plan based on efficacy of intervention                                      | 3.48 | 3.0 |
| Collaborate in Individual Family Service Plan (IFSP) development                          | 2.48 | 0.0 |
| Collaborate in special education referrals                                                | 3.07 | 2.0 |
| <u>Professional Performance</u>                                                           |      |     |
| Establish therapeutic relationships                                                       | 3.65 | 4.0 |
| Maintain professional boundaries                                                          | 3.81 | 4.0 |
| Maintain privacy in accordance with HIPAA and FERPA                                       | 3.91 | 4.0 |
| Act as liaison to community agencies                                                      | 3.27 | 3.0 |
| Communicate with media per policy                                                         | 2.24 | 0.0 |
| Communicate with policy makers regarding trends, data, and school specific issues         | 2.99 | 2.0 |
| Consult with public health department                                                     | 3.41 | 2.0 |
| Interpret health information and communicate effectively                                  | 3.69 | 4.0 |
| Conduct research on matters related to school nursing                                     | 2.90 | 1.0 |
| Participate in research activities                                                        | 2.68 | 1.0 |
| Consult with other student support service providers (e.g. social workers, psychologists) | 3.63 | 4.0 |
| Implement quality improvement activities                                                  | 3.06 | 2.0 |

|                                                                                         |      |     |
|-----------------------------------------------------------------------------------------|------|-----|
| Lead a support group                                                                    | 2.21 | 0.0 |
| Provide equitable care across all populations                                           | 3.68 | 4.0 |
| Advocate for student health needs                                                       | 3.80 | 4.0 |
| Make presentations to school board                                                      | 2.61 | 1.0 |
| Network with other school nurses                                                        | 3.64 | 4.0 |
| Collaborate in multi-disciplinary teams for at-risk students                            | 3.46 | 3.0 |
| Collaborate in health office design                                                     | 3.04 | 1.0 |
| Participate in activities of a professional school nurse organization                   | 3.32 | 3.0 |
| Advocate for health policy and legislation                                              | 3.14 | 2.0 |
| Report illegal, unethical, or inappropriate behavior toward a student                   | 3.77 | 2.0 |
| Serve on school-wide committees                                                         | 3.10 | 2.0 |
| Educate stakeholders on the role of a school nurse                                      | 3.40 | 2.0 |
| Practice according to state and national guidelines, policy, and licensure              | 3.88 | 4.0 |
| Obtain continuing education to maintain school nursing competencies                     | 3.81 | 4.0 |
| Analyze incident/accident report data                                                   | 3.26 | 3.0 |
| <u>Management</u>                                                                       |      |     |
| Analyze results and follow-up of screenings                                             | 3.48 | 3.0 |
| Collect and report data for reimbursable nursing services                               | 2.90 | 2.0 |
| Collect statistical data to measure outcomes                                            | 2.97 | 2.0 |
| Compile community resources list                                                        | 3.16 | 2.0 |
| Compile data for periodic health office report                                          | 3.29 | 3.0 |
| Conduct periodic environmental/safety checks of campus facilities                       | 2.84 | 2.0 |
| Coordinate physical examinations for school participation                               | 2.57 | 1.0 |
| Compile and submit data for state-mandated reports (e.g. immunization, hearing, vision) | 3.56 | 4.0 |
| Provide input into the budget for nursing and health services                           | 3.22 | 2.0 |
| Coordinate school-based screening programs (e.g. vision, hearing)                       | 3.60 | 4.0 |
| Conduct communicable disease surveillance                                               | 3.40 | 3.0 |
| Develop policies and procedures for health care delivery and programs                   | 3.31 | 2.0 |
| Develop health office forms                                                             | 3.27 | 3.0 |
| Document and report medication errors                                                   | 3.71 | 1.0 |
| Document and report suspected child abuse and/or neglect                                | 3.85 | 2.0 |
| Document communications with parents                                                    | 3.82 | 4.0 |
| Document medication administration                                                      | 3.87 | 4.0 |

|                                                                                                      |      |     |
|------------------------------------------------------------------------------------------------------|------|-----|
| Interact and collaborate with contracted/agency personnel                                            | 3.13 | 2.0 |
| Maintain a resource library                                                                          | 2.89 | 2.0 |
| Monitor health needs of student athletes                                                             | 2.94 | 2.0 |
| Obtain necessary release of information forms for students                                           | 3.49 | 3.0 |
| Order and maintain medical and health care supplies                                                  | 3.58 | 4.0 |
| Organize school-linked or school-based clinics (e.g. immunization, dental)                           | 2.88 | 2.0 |
| Participate in quality improvement                                                                   | 3.11 | 2.0 |
| Participate in school community needs assessments                                                    | 2.96 | 1.0 |
| Perform recommended equipment checks                                                                 | 3.42 | 3.0 |
| Prepare for field trips                                                                              | 3.48 | 3.0 |
| Recommend exclusion for student lacking state required immunizations or having communicable diseases | 3.63 | 3.0 |
| Review literature for evidence to support practice                                                   | 3.44 | 3.0 |
| Design/organize a school health office                                                               | 3.16 | 2.0 |
| Serve as advisor/sponsor for student activities (extracurricular activities, sports)                 | 2.06 | 0.0 |
| Sort, group, and analyze data to track trends                                                        | 2.84 | 2.0 |
| Use a confidential data management system to document and protect student health information         | 3.70 | 4.0 |
| Implement evidence-based practice (EBP)                                                              | 3.53 | 3.0 |
| Write grant proposals                                                                                | 2.27 | 0.0 |
| Oversee periodic compliance with medication practices/policy (e.g. safe storage, disposal)           | 3.51 | 3.0 |
| Identify risk factors related to environmental and occupational health hazards                       | 3.16 | 2.0 |
| <u>Personnel</u>                                                                                     |      |     |
| Assess and monitor staff competencies                                                                | 3.19 | 3.0 |
| Conduct performance appraisals                                                                       | 2.61 | 1.0 |
| Contribute self-evaluation for performance appraisal                                                 | 3.30 | 3.0 |
| Delegate tasks according to Nurse Practice Act                                                       | 3.61 | 3.0 |
| Develop job descriptions                                                                             | 2.77 | 1.0 |
| Provide feedback for performance improvement                                                         | 3.14 | 2.0 |
| Facilitate clinical experience for nursing students                                                  | 2.98 | 2.0 |
| Participate in the hiring of new employees                                                           | 2.78 | 1.0 |
| Provide orientation for new school nurses                                                            | 3.41 | 2.0 |
| Mentor new school nurses                                                                             | 3.48 | 2.0 |
| Monitor performance of delegated tasks                                                               | 3.54 | 3.0 |
| Participate in peer review                                                                           | 2.86 | 1.0 |
| Provide in-service education for staff                                                               | 3.38 | 3.0 |
| Assist staff to establish professional goals                                                         | 2.45 | 1.0 |
| Supervise unlicensed personnel                                                                       | 3.38 | 3.0 |

*Note.* a=importance rated on scale of 0-4: 0-of no importance 1-of little importance 2-of moderate importance 3-important 4-very important; b=frequency rated on a scale of 0-4: 0-never 1- seldom 2-occasionally 3-often 4-very often



**ONLINE SUPPLEMENT Table***School Nursing Knowledge Ratings-Comprehensive Listing*

| Knowledge Statement                                    | Mean Importance |
|--------------------------------------------------------|-----------------|
| <u>Health Appraisal</u>                                |                 |
| Subjective Data Collection-General Physical Health     | 3.59            |
| Objective Data Collection-General Physical Health      | 3.69            |
| Interpretation of Data-General Physical Health         | 3.69            |
| Planning-General Physical Health                       | 3.65            |
| Intervention/Referral-General Physical Health          | 3.72            |
| Evaluation-General Physical Health                     | 3.67            |
| Subjective Data Collection-General Psychosocial Health | 3.55            |
| Objective Data Collection-General Psychosocial Health  | 3.56            |
| Interpretation of Data-General Psychosocial Health     | 3.55            |
| Planning-General Psychosocial Health                   | 3.52            |
| Intervention/Referral-General Psychosocial Health      | 3.61            |
| Evaluation-General Psychosocial Health                 | 3.53            |
| Cardiovascular Data Collection                         | 3.61            |
| Cardiovascular Interpretation of Data                  | 3.59            |
| Cardiovascular Planning                                | 3.55            |
| Cardiovascular Intervention/Referral                   | 3.65            |
| Cardiovascular Evaluation                              | 3.58            |
| Ear Data Collection                                    | 3.55            |
| Ear Interpretation of Data                             | 3.51            |
| Ear Planning                                           | 3.47            |
| Ear Intervention/Referral                              | 3.57            |
| Ear Evaluation                                         | 3.51            |
| Endocrine Data Collection                              | 3.58            |
| Endocrine Interpretation of Data                       | 3.54            |
| Endocrine Planning                                     | 3.55            |
| Endocrine Intervention/Referral                        | 3.62            |
| Endocrine Evaluation                                   | 3.55            |
| Eyes Data Collection                                   | 3.60            |
| Eyes Interpretation of Data                            | 3.55            |
| Eyes Planning                                          | 3.52            |
| Eyes Intervention/Referral                             | 3.62            |
| Eyes Evaluation                                        | 3.54            |
| Gastrointestinal Data Collection                       | 3.52            |
| Gastrointestinal Interpretation of Data                | 3.47            |
| Gastrointestinal Planning                              | 3.44            |
| Gastrointestinal Intervention/Referral                 | 3.54            |
| Gastrointestinal Evaluation                            | 3.47            |
| Musculoskeletal Data Collection                        | 3.56            |

|                                                                   |      |
|-------------------------------------------------------------------|------|
| Musculoskeletal Interpretation of Data                            | 3.51 |
| Musculoskeletal Planning                                          | 3.50 |
| Musculoskeletal Intervention/Referral                             | 3.58 |
| Musculoskeletal Evaluation                                        | 3.50 |
| Neuro-Developmental Data Collection                               | 3.52 |
| Neuro-Developmental Interpretation of Data                        | 3.49 |
| Neuro-Developmental Planning                                      | 3.47 |
| Neuro-Developmental Intervention/Referral                         | 3.56 |
| Neuro-Developmental Evaluation                                    | 3.48 |
| Nose, Mouth, and Throat Data Collection                           | 3.51 |
| Nose, Mouth, and Throat Interpretation of Data                    | 3.47 |
| Nose, Mouth, and Throat Planning                                  | 3.45 |
| Nose, Mouth, and Throat Intervention/Referral                     | 3.55 |
| Nose, Mouth, and Throat Evaluation                                | 3.45 |
| Reproductive/Genitourinary Data Collection                        | 3.31 |
| Reproductive/Genitourinary Interpretation of Data                 | 3.25 |
| Reproductive/Genitourinary Planning                               | 3.26 |
| Reproductive/Genitourinary Intervention/Referral                  | 3.36 |
| Reproductive/Genitourinary Evaluation                             | 3.26 |
| Respiratory Data Collection                                       | 3.70 |
| Respiratory Interpretation of Data                                | 3.68 |
| Respiratory Planning                                              | 3.65 |
| Respiratory Intervention/Referral                                 | 3.71 |
| Respiratory Evaluation                                            | 3.66 |
| Skin and Scalp Data Collection                                    | 3.41 |
| Skin and Scalp Interpretation of Data                             | 3.37 |
| Skin and Scalp Planning                                           | 3.36 |
| Skin and Scalp Intervention/Referral                              | 3.44 |
| Skin and Scalp Evaluation                                         | 3.36 |
| <u>Emergency Health Problems and Nursing Management</u>           |      |
| Abdominal system                                                  | 3.63 |
| Anaphylaxis                                                       | 3.93 |
| Burns                                                             | 3.56 |
| Cardiac system                                                    | 3.76 |
| Dental/Oral                                                       | 3.42 |
| Head trauma                                                       | 3.91 |
| Hemorrhage/bleeding                                               | 3.86 |
| Lacerations/Punctures/Avulsions                                   | 3.79 |
| Overdose, Poisoning and Exposure                                  | 3.75 |
| Respiratory system                                                | 3.88 |
| Spinal Cord                                                       | 3.71 |
| Neurological system                                               | 3.76 |
| Mental Health                                                     | 3.70 |
| Musculoskeletal system                                            | 3.69 |
| <u>Acute, Episodic, Chronic Conditions and Nursing Management</u> |      |
| Cardiovascular system                                             | 3.75 |

|                                                                        |      |
|------------------------------------------------------------------------|------|
| Gastrointestinal system                                                | 3.67 |
| Genitourinary/Reproductive system                                      | 3.49 |
| Eye, Ear, Nose, and Throat                                             | 3.64 |
| Integumentary system                                                   | 3.57 |
| Mental Health                                                          | 3.67 |
| Metabolic and Endocrine                                                | 3.71 |
| Autoimmune Diseases                                                    | 3.51 |
| Allergies                                                              | 3.78 |
| Cancer                                                                 | 3.39 |
| Genetic/Birth Defects                                                  | 3.42 |
| Musculoskeletal system                                                 | 3.62 |
| Neurosensory                                                           | 3.55 |
| Respiratory system                                                     | 3.81 |
| <u>Communicable/Non-Communicable Diseases and Nursing Management</u>   |      |
| Bacterial infection                                                    | 3.71 |
| Viral infection                                                        | 3.70 |
| Fungal infection                                                       | 3.55 |
| Sexually Transmitted Infection/Disease                                 | 3.32 |
| Infestations                                                           | 3.50 |
| <u>Risk Reduction and Infection Control</u>                            |      |
| Immunizations                                                          | 3.88 |
| Identification of Risk Factors                                         | 3.68 |
| Surveillance                                                           | 3.52 |
| Self-Care Skills for Prevention                                        | 3.55 |
| Group Education for Prevention                                         | 3.30 |
| <u>Health Education</u>                                                |      |
| Students                                                               | 3.76 |
| Staff                                                                  | 3.41 |
| Families                                                               | 3.42 |
| Communities/Stakeholders                                               | 3.10 |
| <u>Health Promotion/Disease Prevention</u>                             |      |
| Counseling/Conflict Resolution                                         | 3.27 |
| Community Health Needs                                                 | 3.28 |
| Cultural Considerations                                                | 3.41 |
| Environmental Concerns                                                 | 3.37 |
| Safety Education                                                       | 3.55 |
| Disaster Preparedness                                                  | 3.54 |
| <u>Special Health Issues</u>                                           |      |
| Abuse and Neglect                                                      | 3.80 |
| Assistive Care                                                         | 3.20 |
| Eating Disorders                                                       | 3.37 |
| Human Sexuality                                                        | 3.26 |
| Gender Identity                                                        | 3.19 |
| Pregnancy/Parenting                                                    | 3.20 |
| Physical Problems (e.g., organ transplant, low-incidence disabilities) | 3.30 |

|                                                                        |      |
|------------------------------------------------------------------------|------|
| Psychosocial Problems (e.g., self-harm, trauma, suicide)               | 3.64 |
| Substance Use, Abuse, and Addiction                                    | 3.50 |
| Assistive Technology                                                   | 3.15 |
| Bullying, Harassment, Violence                                         | 3.45 |
| Other (e.g., human trafficking, homelessness/poverty, food insecurity) | 3.38 |
| Laws Relating to Special Education (e.g., IDEA)                        | 3.65 |
| Americans with Disabilities Act                                        | 3.71 |
| Individualized Education Plan                                          | 3.57 |
| Individualized Healthcare Plan                                         | 3.75 |
| Section 504 Plan                                                       | 3.70 |
| Emergency Action Plan                                                  | 3.81 |
| Resources/Referrals                                                    | 3.62 |
| <u>Professional Issues</u>                                             |      |
| Job Description                                                        | 3.79 |
| Malpractice                                                            | 3.73 |
| Documentation                                                          | 3.89 |
| Supervision, Delegation, and Evaluation of Professional Licensed Staff | 3.74 |
| Supervision, Delegation, and Evaluation of Unlicensed Personnel        | 3.69 |
| Supervision, Delegation, and Evaluation of Volunteers                  | 3.43 |
| Leadership (e.g., mentoring, orienting, advocating)                    | 3.62 |
| State and Federal Laws, Regulations, and Guidelines                    | 3.68 |
| School Board Policy                                                    | 3.63 |
| Scope of School Health Services                                        | 3.77 |
| Research and Evidence-Based Practice                                   | 3.62 |
| <u>Electronic and Hard Copy Health Records</u>                         |      |
| Accuracy                                                               | 3.86 |
| Confidentiality                                                        | 3.89 |
| Storage                                                                | 3.75 |
| Student and Parent Rights                                              | 3.81 |
| Access to Records                                                      | 3.77 |
| Authorization for Release/Exchange of Information                      | 3.82 |
| Analysis and Reporting                                                 | 3.60 |
| <u>Medication Policies and Procedures</u>                              |      |
| Prescription Administration                                            | 3.92 |
| Nonprescription Administration                                         | 3.91 |
| Medical Authorization                                                  | 3.92 |
| Parental Authorization                                                 | 3.90 |
| Documentation                                                          | 3.91 |
| Safety, and Storage                                                    | 3.91 |
| <u>Treatment Policy</u>                                                |      |
| Authorization for Treatment                                            | 3.90 |
| Protocols and Procedures                                               | 3.89 |
| <u>Legal Issues</u>                                                    |      |
| Child Abuse/Neglect Reporting of a Minor                               | 3.78 |

|                                                                    |      |
|--------------------------------------------------------------------|------|
| Child Abuse/Neglect Reporting of a Guardian                        | 3.70 |
| Individual Rights to Privacy                                       | 3.81 |
| Confidentiality (e.g., HIPAA, FERPA)                               | 3.86 |
| Communicable Disease Reporting                                     | 3.74 |
| Harassment                                                         | 3.63 |
| Local Policy, State, and Federal Laws (e.g., McKinney-Vento, ESSA) | 3.67 |

---

*Note.* a=importance rated on scale of 0-4: 0-of no importance 1-of little importance 2-of moderate importance 3-important 4-very important
